# Supplementary material for: Tenascin-C expression contributes to pediatric brainstem glioma tumor phenotype and represents a novel biomarker of disease
Source: PubMed Central journal article supplement (PMC6518697; doi:10.1186/s40478-019-0727-1), 2019-05-15
Supplement: 40478_2019_727_MOESM5_ESM.pdf [file 40478_2019_727_MOESM5_ESM.pdf]

Table with columns for various identifiers and numerical values. The table contains multiple rows of data, each starting with a unique identifier (e.g., 1.1381034, 1.1312104, 1.1312105, etc.) followed by a series of numerical values. The values are organized into columns, with some columns containing multiple values per row. The data appears to be a structured list of numerical parameters or coordinates.
